# Supplementary material for: Single-Tubed Wild-Type Blocking Quantitative PCR Detection Assay for the Sensitive Detection of Codon 12 and 13 KRAS Mutations
Source: PubMed Central journal article supplement (PMC4689371; doi:10.1371/journal.pone.0145698), 2015-12-23
Supplement: pone.0145698.s003.pdf [file pone.0145698.s003.pdf]

**Figure S3. Sensitivities of real-time WTB-PCR**

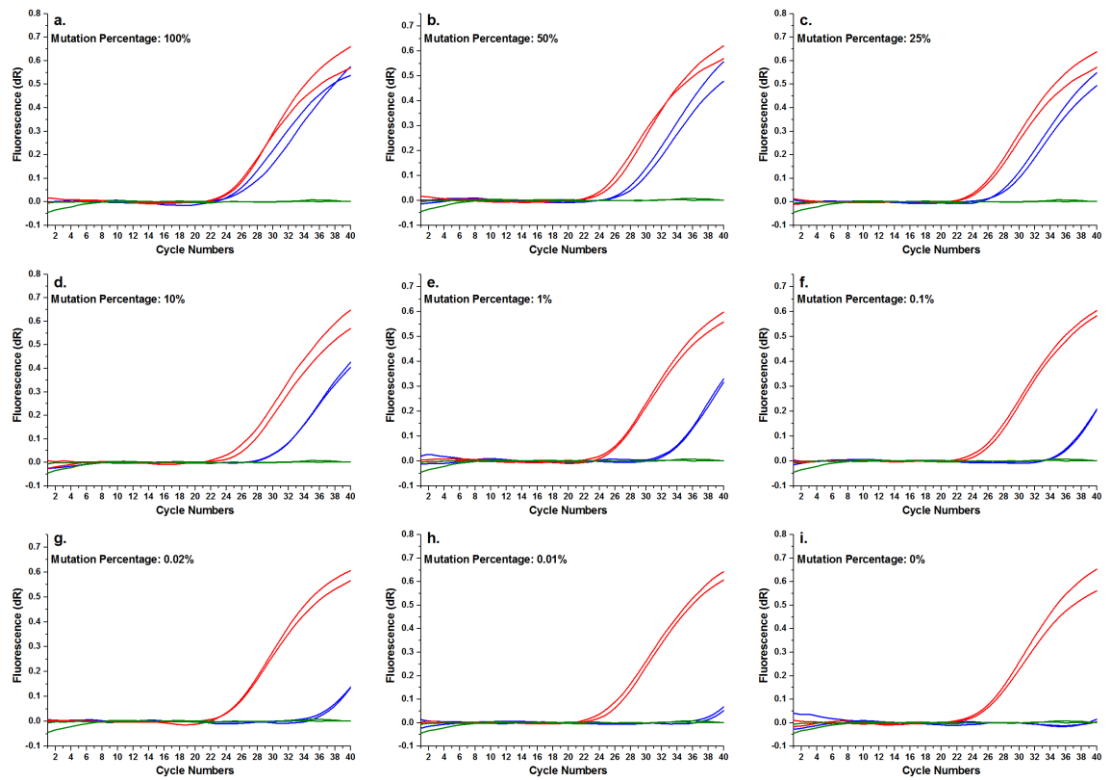

Pane a to i show the amplification curves of real-time PCR with and without WTB, containing specific c.35G>A allele mutation percentages. The blue and red line curves indicate PCR with and without WTB, respectively. The olive lines indicate the results from the NTC mixture.
